# A multimodal dataset for precision oncology in head and neck cancer

Marion Dörrich<sup>1</sup>, Matthias Balk<sup>2</sup>, Tatjana Heusinger<sup>2,3</sup>, Sandra Beyer<sup>2,4</sup>, Hassan Kanso<sup>2</sup>, Christian Matek<sup>5</sup>, Arndt Hartmann<sup>5,6</sup>, Heinrich Iro<sup>2</sup>, Markus Eckstein<sup>5,6†</sup>, Antoniu-Oreste Gostian<sup>2,3,6†</sup>, Andreas M. Kist<sup>1\*†</sup>

<sup>1</sup>Department Artificial Intelligence in Biomedical Engineering, Friedrich-Alexander-Universität Erlangen-Nürnberg, Erlangen, 91052, Germany.

<sup>2</sup>Department of Otolaryngology - Head and Neck Surgery, University Hospital Erlangen, Friedrich-Alexander-Universität Erlangen-Nürnberg, Erlangen, 91054, Germany.

<sup>3</sup>Department of Otorhinolaryngology, Head and Neck Surgery, Merciful Brothers Hospital St. Elisabeth, Straubing, 94315, Germany.

<sup>4</sup>Department of Oral and Maxillofacial Surgery, University Hospital Erlangen, Friedrich-Alexander-Universität Erlangen-Nürnberg, Erlangen, 91054, Germany.

<sup>5</sup>Institute of Pathology, University Hospital Erlangen, Friedrich-Alexander-Universität Erlangen-Nürnberg, Erlangen, 91054, Germany.

<sup>6</sup>Comprehensive Cancer Center EMN, University Hospital Erlangen, Friedrich-Alexander-Universität Erlangen-Nürnberg (FAU), Erlangen, 91054, Germany.

\*Corresponding author(s). E-mail(s): [andreas.kist@fau.de](mailto:andreas.kist@fau.de);

†These authors contributed equally as senior authors.

## Abstract

Head and neck cancer is a common disease and is associated with a poor prognosis. A promising approach to improving patient outcomes is personalized treatment, which uses information from a variety of modalities. However, only little progress has been made due to the lack of large public datasets. We present a multimodal dataset, HANCOCK, that comprises monocentric, real-world data of 763 head and neck cancer patients. Our dataset contains demographical, pathological, and blood data as well as surgery reports and histologic images. We show its potential clinical impact in a multimodal machine-learning setting by proposing adjuvant treatment for previously unidentified risk patients. We found that especially the multimodal model outperformed single-modality models (area under the curve (AUC): 0.85). We believe that HANCOCK will not only open new insights into head and neck cancer pathology but also serve as a major source for researching multimodal machine-learning methodologies in precision oncology.

## 1 Introduction

2 Head and neck cancer is the seventh most common malignancy worldwide [1]. Patients  
3 diagnosed with head and neck cancer have a poor prognosis [2]. Despite recent  
4 advances in diagnostics and treatments, such as immunotherapy, the 5-year survival  
5 ranges only between 25% and 60% [3]. The most common head and neck cancer devel-  
6 ops in several locations, e.g. the oral cavity, pharynx, or larynx, and is derived from  
7 squamous cells, i.e. originates from the mucosal epithelium lining the inner areas of  
8 these sites. The cancer often spreads to regional lymph nodes, which further worsens  
9 the prognosis of affected patients [4].

10 After assessing the medical history and physical examination, a panendoscopy  
11 with biopsy is usually performed to confirm the diagnosis. The pathological analysis  
12 of tissue samples is crucial for determining the histological entity. Additionally, lymph  
13 nodes are examined for possible metastases. Surgery is one of the most important  
14 pillars of treatment for head and neck cancer. Local surgery is often sufficient for lower-  
15 stage cancer, while adjuvant treatment such as radiotherapy or radiochemotherapy is  
16 required for higher stages [5]. Despite many advances in diagnostics, the treatment  
17 choice still depends mainly on the stage of the disease that is mainly determined by the  
18 size of the tumor [5, 6]. However, research showed that cancer is highly diverse among  
19 patients [7] and therefore requires precision oncology. The key to this personalized  
20 treatment is the establishment of reliable and predictive biomarkers. Initiatives such  
21 as The Cancer Genome Atlas (TCGA) have already achieved a better understanding  
22 of the genetic and molecular characteristics of many types of cancer [8].

23 However, very few biomarkers are currently used in routine head and neck cancer  
24 treatment. A positive prognostic biomarker is the association with human papillo-  
25 mavirus (HPV) in oropharyngeal carcinomas [9]. Ongoing research aims to explore if  
26 their treatment can be de-escalated to reduce toxicity [10]. Furthermore, the expres-  
27 sion of programmed death ligand 1 (PD-L1) can be assessed to identify patients who  
28 may benefit from immune checkpoint inhibitors such as pembrolizumab, and remains  
29 the only applied predictive biomarker for now [11]. However, more reliable biomarkers  
30 need to be established to enable a truly personalized treatment. Although information  
31 from a large variety of sources is routinely acquired, its full potential cannot be real-  
32 ized for data-driven exploration yet. Careful data curation and multimodal integration  
33 are required to unravel complex data dependencies. We hypothesize that a lack of  
34 such large, multimodal, publicly available datasets hinders the research of predictive  
35 biomarkers for head and neck oncology.

36 To our knowledge, existing head and neck cancer datasets only have a lim-  
37 ited number of cases or have inconsistent metadata [12–15]. For example, a study  
38 focusing on radiomics included data from 288 cases while only selecting oropharyn-  
39 geal carcinomas [15]. Another dataset focusing on proteomics includes radiology and  
40 histopathology data but is limited to 122 cases [13]. Comprehensive data including  
41 clinical, genomic, and histopathologic data has been collected on TCGA from more  
42 than 500 cases to date, however, the multicenter data is very heterogeneous [12, 16].

43 To address these issues, we collected monocentric, retrospective data from more  
44 than 700 head and neck cancer patients. We built a comprehensive dataset from multi-  
45 modal data including demographics, blood data, surgery reports, pathologic data, and

46 histologic images. These include Whole Slide Images (WSIs) with routine hematoxylin  
47 and eosin (HE) staining and Tissue Microarrays (TMAs) with staining for several  
48 immune cell populations. In this work, we aimed to explore and provide reproducible  
49 strategies for multimodal integration and analysis. We aimed to predict patient out-  
50 comes and investigate adjuvant treatment choices using multimodal Machine Learning  
51 (ML) strategies to show the impact of multimodal data integration for head and neck  
52 oncology.

## 53 Results

### 54 **Compilation of a multimodal dataset from a head and neck** 55 **cancer cohort**

56 Patient diagnoses and treatment decisions are rarely based on a single modality;  
57 hence, artificial intelligence (AI) models intended to assist clinicians should adopt a  
58 holistic approach, incorporating multiple data sources. Training such models requires  
59 extensive and diverse patient data, which is often scarce. To address this, we have  
60 aggregated a comprehensive dataset, HANCOCK (Head And Neck Cancer dataset),  
61 which consists of real-world data from 763 patients. In detail, we collected, cleaned,  
62 and harmonized routinely acquired monocentric data from patients diagnosed with  
63 oral cavity, oropharyngeal, hypopharyngeal, and laryngeal cancer. We integrated dif-  
64 ferent modalities including demographics, blood data, pathology reports, surgery  
65 reports, and histologic images, as shown in Figure 1A. We provide an overview and  
66 easy, public access to the individual patient data for convenient manual exploring at  
67 [www.hancock.research.fau.edu](http://www.hancock.research.fau.edu) with support of the FAUDataCloud.

68 A core strength of HANCOCK is its rich base of imaging data: HE-stained WSIs  
69 of the primary tumor are available for 701 out of 763 patients. We provide also manual  
70 annotations of tumor regions in these WSIs, as shown in Supplementary Fig. S1. In  
71 addition, 396 HE-stained slides of adjacent lymph nodes were included. Each patient  
72 contains at most 32 TMAs, which reflect two cores, eight stains, and two locations.  
73 Each core is stained with either HE or immunohistochemistry (IHC) markers, such as  
74 CD3 and PD-L1. Figure 1B shows exemplarily the available imaging data for a single  
75 patient. For each patient, the pathology report was included in a structured format.  
76 These cover tumor characteristics such as the primary site or grading (see Figure 1E)  
77 crucial for selecting a suitable treatment. Additional characteristics such as tumor  
78 staging, resection margin, and infiltration depth are summarized in Supplementary  
79 Fig. S2.

80 As shown in Figure 1C, 80% of the patients in the dataset are males and 72%  
81 are former or current smokers. The median age is 61 years. Thus, our patient cohort  
82 reflects the current demographics of head and neck cancer [1], which is beneficial for  
83 generalizing our findings to a broader population. The laboratory data includes the  
84 complete blood count as well as coagulation parameters, electrolytes, renal function  
85 parameters, and C-reactive protein. Figure 1D shows for how many patients the indi-  
86 vidual parameters are available and how many of the measured blood parameters are  
87 in the normal or abnormal range.

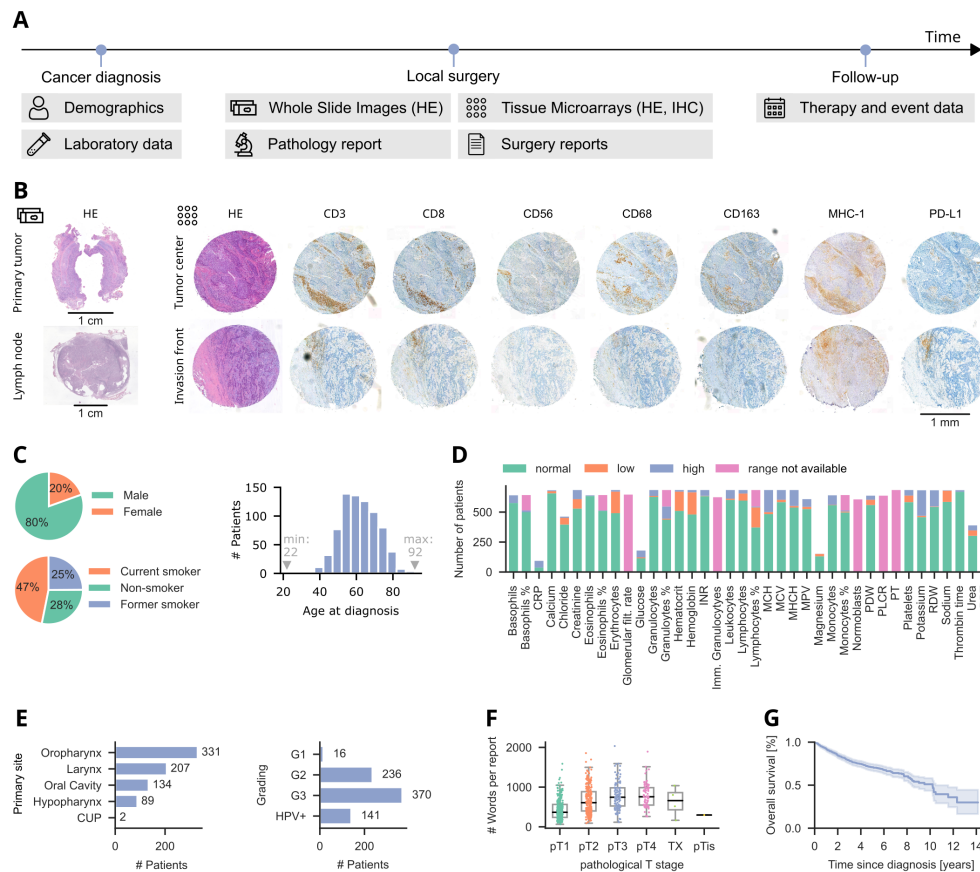

**Fig. 1** Overview of the multimodal head and neck cancer dataset. (A) Data sources. For cancer diagnosis, demographics were assessed and blood tests were performed. In the ablative surgery, tissue samples were obtained and the pathological report was written. The dataset also features information about the treatment choice, events, and survival. (B) Image data of a patient. Shown are Whole Slide Images of the primary tumor and lymph node with hematoxylin and eosin (HE) staining and Tissue Microarray cores from the tumor center and invasion front with HE and immunohistochemistry (IHC) staining. (C) Demographical data, shown as the number of patients per sex, smoking status, and age at initial diagnosis. (D) Laboratory data. Shown is the number of patients for which each parameter is available. The colors indicate values inside or outside of the normal range. (E) Primary tumor site or CUP (cancer of unknown primary) and grading from the pathology report. HPV-associated carcinoma was not graded. (F) Number of words in each German surgery report grouped by pathological T stage. (G) Kaplan-Meier plot of overall survival with 95% confidence interval shown as shaded error.

88 The incorporation of treatment information and temporal event data allows an  
 89 in-depth analysis of the underlying relationships. To this end, we extracted and  
 90 de-identified plain text descriptions of the surgery and medical history from text docu-  
 91 ments. Figure 1F illustrates the length of surgery reports, which seems to increase with  
 92 the pathological T stage. All German text files were translated into English to improve  
 93 their accessibility (see Methods). OPS codes (German procedure classification) define

94 the medical procedures applied. We also extracted ICD codes (International Statis-  
95 tical Classification of Diseases and Related Health Problems) of the German version  
96 ICD-10-GM from the text documents. The ICD codes allow a detailed classification  
97 of malignancies and their sites. The most frequent ICD codes were C10.8 and C32.0,  
98 as shown in Supplementary Fig. S3D. C10.8 corresponds to a malignant neoplasm  
99 in overlapping regions of the oropharynx and C32.0 corresponds to a malignant neo-  
100 plasm of the glottis [17]. We believe that ICD coded will allow easy subsampling of  
101 the full dataset.

102 In HANCOCK, each patient is tracked from the time of initial diagnosis to either  
103 the end of follow-up or death, with follow-up periods lasting as long as 14 years (see  
104 Supplementary Fig. S4). This enables the examination of temporal information, for  
105 example in the form of treatment timelines (see Supplementary Fig. S5) and sur-  
106 vival analyses. Figure 1G shows the overall survival of all patients in the HANCOCK  
107 dataset. Survival curves with additional information such as the number of censored  
108 patients can be found in Supplementary Fig. S6D and survival curves grouped by pri-  
109 mary site, stage, and grading are shown in Supplementary Fig. S6A-C. The 5-year  
110 survival rate in our cohort is 77.3%.

111 Overall, the dataset features a great variety of modalities for a large patient cohort  
112 (763 cases), which resembles the global demographics of head and neck cancer.

## 113 **Multimodal data integration allows prediction of clinical** 114 **outcomes**

115 After carefully aggregating the patient data, we were next interested in investigat-  
116 ing the overall patient collective. To better understand the complex patient data, we  
117 encoded information from each modality individually and concatenated these encod-  
118 ings into vectors, termed multimodal patient vectors, as shown in Figure 2A. Given  
119 the high-dimensional nature of these vectors (the multimodal patient vectors con-  
120 tain 103 dimensions each, see Methods), these patient-centered features can hardly  
121 be examined or interpreted by humans. Therefore, we applied Uniform Manifold  
122 Approximation and Projection (UMAP) to these vectors to project them into a lower,  
123 two-dimensional space, as shown in Figure 2B and C. In Supplementary Fig. 7, we  
124 provide a comprehensive overview of incorporated features and their distribution in  
125 the UMAP projection.

126 Subsequently, we sought to identify distinct patient clusters using these multi-  
127 modal patient vectors. We hypothesized that similar patient groups would converge  
128 within specific areas of the two-dimensional UMAP projection. Our findings confirm  
129 this hypothesis, as we observed that patients sharing particular characteristics tended  
130 to form distinct clusters. For instance, patients diagnosed with HPV-positive orophary-  
131 ngeal carcinoma often exhibited a high density of CD8+ cells, as illustrated in  
132 Figure 2C. Additionally, our analysis revealed that both CD3+ and CD8+ cell den-  
133 sities at the tumor center and the invasion front were notably higher in patients who  
134 did not experience recurrence compared to those who did (Supplementary Fig. S8).  
135 These observations are consistent with prior studies in head and neck oncology [9],  
136 underscoring the relevance and accuracy of the HANCOCK dataset.

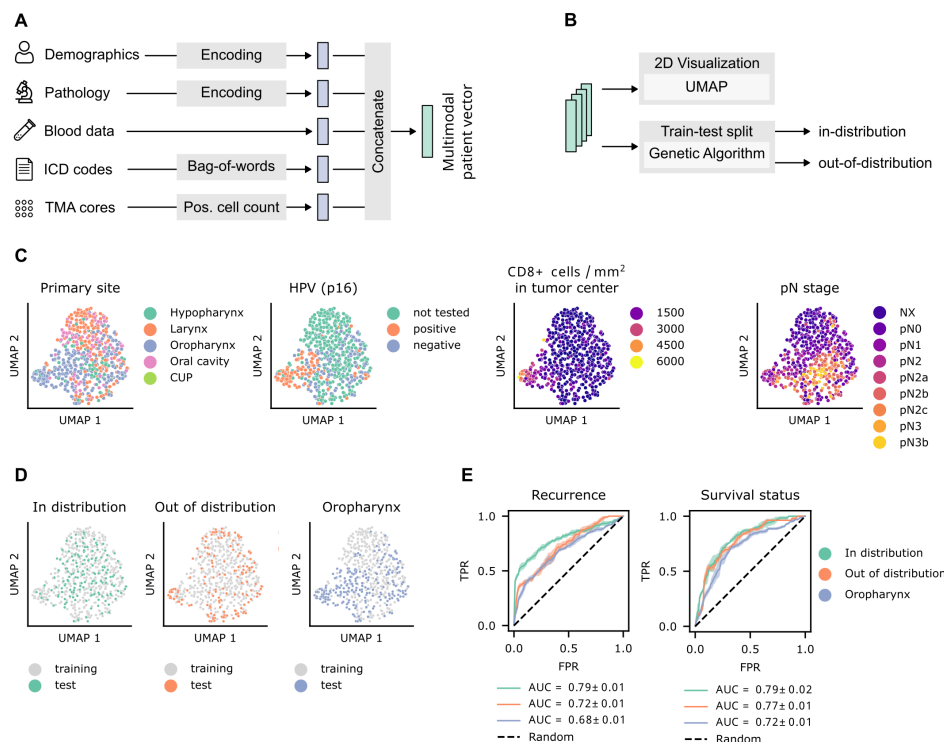

**Fig. 2** Multimodal embeddings. (A) For each patient, information from distinct modalities were encoded and concatenated to multimodal patient vectors. (B) We applied Uniform Manifold Approximation and Projection (UMAP) to visualize the vectors in 2D and we implemented a genetic algorithm to create two test datasets, one in the distribution of the training data and one out of the distribution. (C) Visualization of two-dimensional embeddings, colored by features of the encoded data. (D) UMAP plots of three different train-test splits (E) Receiver-operating characteristics (ROC) curves of a Random Forest classifier for the three splits and two prediction tasks. The mean values and standard deviations of the ROC curves and Area under the Curve (AUC) scores are shown. The colors correspond to the different splits in D.

137 We aimed to investigate whether ML models could predict clinical outcomes, i.e.  
 138 recurrence and survival status, using the encoded multimodal data. We were also  
 139 interested in defining different hold-out test datasets that would allow a robust esti-  
 140 mation of a model's performance. To this end, we defined three data splits that divide  
 141 the cases into one training and one test set. We hypothesize that the performance of  
 142 models can be over- or under-estimated depending on how similar the test data is to  
 143 the training data, especially in a complex, high-dimensional, and multimodal setting  
 144 as in our case. To address and investigate this issue, we implemented a genetic algo-  
 145 rithm to automatically define two dataset splits based on multidimensional features.  
 146 The algorithm uses evolutionary optimization to find (i) cases that follow the over-  
 147 all distribution ("in distribution") or (ii) cases that lie outside the distribution and  
 148 are maximally dissimilar to each other ("out of distribution"). In both settings, the  
 149 genetic algorithm preserves the distribution of target classes (recurrence and survival

150 status) in the resulting training and test sets, which is important for model evaluation  
151 [18]. The respective class distributions are shown in Supplementary Fig. S9C-D.  
152 Additionally, we defined a third split where all patients with a carcinoma located in  
153 the oropharynx were assigned to the test dataset, rendering it very dissimilar and  
154 biased to the training data. These three training/test data splits are highlighted in  
155 the UMAP representation in Figure 2D.

156 Next, we trained an ML model, namely a Random Forest classifier, to predict the  
157 recurrence and survival status of each patient by using the multimodal patient vectors  
158 as inputs. This corresponds to an early fusion approach since the modality vectors  
159 are first concatenated and then used to train a single model [19]. Figure 2E shows the  
160 performance of the classifiers for the previously mentioned train-test splits (see Figure  
161 2D for reference). As expected, the model had difficulty predicting patient outcomes  
162 for the test dataset consisting of cases with oropharyngeal carcinoma, a primary site  
163 that the model has not seen during training. This is highlighted by the lowest Area  
164 Under the Curve (AUC) score as shown in Figure 2E compared to the other test sets.  
165 In accordance with our hypothesis, the classification performance was higher for the  
166 "in distribution" than the "out of distribution" test dataset as shown in Figure 2E.  
167 Overall, we can provide evidence that multimodal ML models follow expected ML  
168 behavior and were able to successfully estimate the prognosis of patients, achieving a  
169 maximum average AUC score of 0.79 for both recurrence and survival prediction.

## 170 **Multimodal machine learning enables improved adjuvant** 171 **treatment selection**

172 An important choice in oncologic therapy is whether an adjuvant treatment is required  
173 for a given patient. That means, identifying risk patients that benefit from an adju-  
174 vant therapy is crucial. We analyzed the HANCOCK patient cohort and found that  
175 some patients did not receive adjuvant treatment, but eventually had a recurrence or  
176 deceased (Figure 3A), suggesting that exactly this patient collective are risk patients  
177 who would have potentially benefited from adjuvant therapy. We assume that all other  
178 patients in our dataset received appropriate treatment to the best of the treating  
179 physicians' knowledge. We then were interested in how the potentially unidentified  
180 risk patients would have been classified (adjuvant therapy needed yes/no) by a mul-  
181 timodal ML model. Hence, we assigned these cases to a hold-out test dataset (Figure  
182 3A). The remaining cases, i.e. cases with adjuvant therapy and cases without adjuvant  
183 therapy and no recurrence or death, were assigned to a training dataset.

184 First, we evaluated the benefits of multimodality vs. single modalities. Therefore,  
185 we trained ML models on the multimodal patient vectors and each of the modalities  
186 separately. These modalities include clinical, pathological, and blood data as well as  
187 the density of CD3- and CD8-positive cells and ICD codes. Figure 3B shows the  
188 corresponding average Receiver-operating characteristic (ROC) curves using 10-fold  
189 cross-validation. As shown in Figure 3B, the classifier integrating the multimodal  
190 data outperformed all single-modality classifiers with a mean AUC score of 0.85. This  
191 finding is in line with previous works that have shown the superior performance of  
192 ML models trained on several modalities compared to data with limited information  
193 from a single source [20, 21]. Out of the single-modality models, the classifier trained

194 on pathological data achieved the highest mean AUC score of 0.81, as shown in Figure  
195 3B.

196 We next trained a classifier on the full, multimodal training data. Figure 3C shows  
197 the predictions of this trained model for the hold-out test dataset, i.e. the potential  
198 risk patients (orange cohort in Figure 3A). Figure 3C reveals that the multimodal ML  
199 classifier suggested an adjuvant therapy for 74 out of 100 cases. Furthermore, Figure  
200 3D shows that the 74 patients for whom an adjuvant treatment was proposed, were  
201 high-risk patients i.e. their probability of recurrence-free survival and overall survival  
202 were significantly lower than for the other 26 patients ( $p \leq 0.001$ , log-rank test).

203 The incorporation of ML in clinical practice is often hindered by a lack of  
204 explainability and its "black box" nature [22]. To improve the interpretability of our  
205 multimodal approach, we obtained SHAP values that explain the impact of individ-  
206 ual features on the model output [23]. Figure 3E shows the twelve most important  
207 characteristics in a summary plot. The four features with the highest impact were  
208 pathological features, agreeing with the high AUC score of the pathological model in  
209 Figure 3B. For example, a high pathological N and T stage led to a higher probabili-  
210 ty of predicting an adjuvant treatment. These two features had the greatest impact  
211 on the predictions, which is consistent with the fact that the treatment choice mainly  
212 depends on the stage of the disease [5]. However, adjuvant treatment was not likely to  
213 be predicted for laryngeal carcinomas and glottic carcinomas in particular, as shown  
214 in Figure 3E as the ICD code C32.0 stands for malignant neoplasms of the glottis [17].  
215 A demographic feature, namely the age at initial diagnosis, also had a high impact  
216 on the outputs; With increasing age, the need for an adjuvant therapy became less  
217 likely. Furthermore, an HPV association had a high impact on not predicting adjuvant  
218 treatment, which is consistent with results showing that HPV-positive patients have a  
219 better prognosis [9] (see survival grouped by HPV status in Supplementary Fig. 6D).

220 Taken together, our results suggest that multimodal models can integrate more  
221 valuable information than single modality models, and could be useful for assisting in  
222 adjuvant treatment selection: in this case, 3 out of 4 patients would have potentially  
223 benefited from an adjuvant therapy questioning current clinical guidelines and sug-  
224 gesting the incorporation of multimodal ML models. We showed that our ML model  
225 relied on the stage and also on a variety of other characteristics such as infiltration  
226 depth, perinodal invasion, age, and HPV association.

## 227 **Treatment choice prediction using immunohistochemistry** 228 **images**

229 Computer vision approaches on histopathological image data have shown promising  
230 results in a variety of oncology settings [21, 22, 24]. We were interested if the image  
231 data in the HANCOCK dataset is as well suited for multimodal data integration.  
232 Using the dataset split shown in Figure 3A, we explored an approach for integrating  
233 image features and the encoded tabular data to train a convolutional, deep neural  
234 network. To this end, we analyzed the TMAs taken from the tumor center. Each  
235 TMA contains multiple samples and two cores were available for each patient, as  
236 shown in Figure 4A. We extracted a single  $1024 \times 1024 \mu\text{m}$  tile from each TMA core.  
237 Figure 4B shows that we used TMAs stained with seven distinct IHC markers and



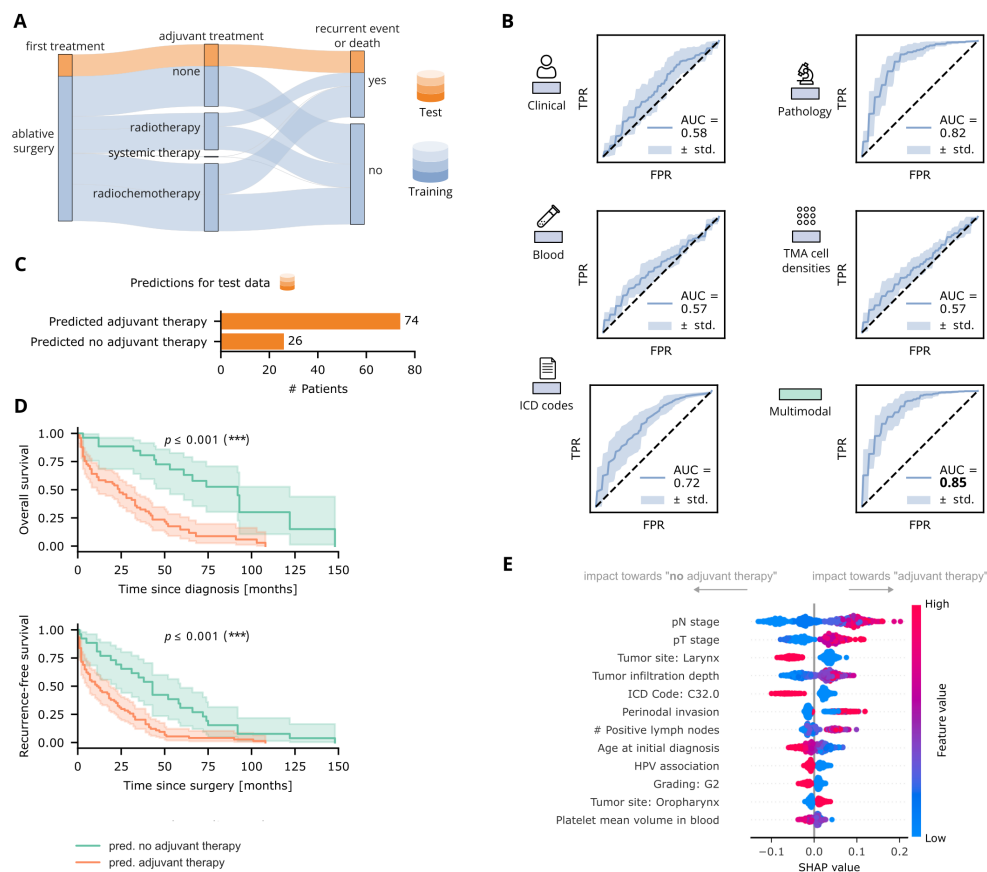

**Fig. 3** Prediction of treatment choice. (A) Patients who did not receive adjuvant therapy but did have a recurrence or deceased within 5 years (highlighted in orange) were assigned to the test dataset. All other patients were assigned to the training dataset. (B) Receiver-operating characteristic (ROC) curves of Random Forest classifiers trained on single-modal and multimodal data using 10-fold cross-validation with the mean Area Under the Curve (AUC). (C) The multimodal model predicted adjuvant therapy for 74% of cases in the test dataset. (D) Kaplan-Meier curves for the test dataset, with patients grouped by predictions. The log-rank test was used. (E) SHAP summary plot for model interpretability, showing the 12 most important features of the multimodal model (trained on the full training data), computed for all validation folds.

238 the standard HE stain. All tiles were fed to a VGG16 pre-trained on ImageNet to  
 239 extract high-level features [25, 26]. The features were "deep texture representations"  
 240 of the images, following the technique of Komura et al. [27]. We found that there was  
 241 a relationship between these image representations and the computed cell density of  
 242 CD3- and CD8-positive cells, as shown in Supplementary Fig. S10.

243 For each patient, a two-dimensional embedding was created by stacking the image  
 244 features and the multimodal patient vectors (see Methods). The resulting image-like

245 embeddings were used to train a Convolutional Neural Network (CNN, see Figure 4)  
246 to the same task as in Figure 3.

247 Figure 4D shows that the network achieved a mean AUC of 0.81 in 10-fold cross-  
248 validation. Thus, it did not outperform the ML model trained on the high-level  
249 multimodal patient vectors alone (compare Figure 3C) but performed in a similar  
250 range. We hypothesized that some parts of the multimodal feature vectors con-  
251 tained information that overlapped with the information in the image embeddings,  
252 namely the structured pathological data and cell densities, which are derived from  
253 the histopathological imaging data. Figure 4D shows that models lacking these fea-  
254 tures resulted in a decrease in the classification performance. We found that the CNN  
255 was still able to reach a mean AUC of 0.69 on the image representations alone which  
256 indicates that valuable information was contained in the extracted features.

257 The network predicted an adjuvant treatment for 58 out of 100 cases, see Figure  
258 4E. The respective Kaplan-Meier curves (see Figure 4F) show that the overall and  
259 recurrence-free survival probability was significantly lower in patients, for whom the  
260 model suggested adjuvant therapy ( $p \leq 0.001$  and  $p \leq 0.01$ , log-rank test).

261 Next, we were interested in analyzing the impact of different modalities on the  
262 CNN's predictions. We generated SHAP image plots to create visual explanations. An  
263 example is shown in Figure 4G. We found that patterns within the image embeddings  
264 as well as individual features in the multimodal patient vectors were highlighted. This  
265 indicates that stacking extracted image features and encoded tabular features might  
266 be a valuable approach to multimodal Deep Learning with the advantage of being  
267 computationally inexpensive. Overall, we were able to integrate image data using a  
268 simple early fusion approach to train a deep neural network, yielding promising results.

## 269 Discussion

270 In this study, we provide a novel monocentric dataset - HANCOCK - comprising 763  
271 patients with multimodal data. The modalities include demographical, pathological,  
272 and blood data, WSIs from primary cancer and lymph nodes, and TMAs with IHC  
273 staining. We show that the dataset is rich and diverse, and not biased towards a single  
274 domain (Figures 1 and 2). By integrating multimodal data through diverse machine  
275 and deep learning approaches, we can show that this allows better prediction of sur-  
276 vival and recurrence (Figure 2F), as well as providing a superior choice for adjuvant  
277 therapy across AI technologies (Figures 3 and 4). With our transparent and open  
278 approach, we hope the HANCOCK dataset will fuel further developments in multi-  
279 modal data integration and head and neck oncology. By reproducing previous findings,  
280 such as the predictive behavior of HPV and PD-L1, we believe that HANCOCK will  
281 be very useful in biomarker discovery and validation.

282 We found some limitations in our work, which can be addressed in future studies.  
283 For example, we did not integrate WSIs of the primary tumors or lymph nodes to  
284 train deep neural networks. Instead, we focused on TMA tiles as inputs since they  
285 provide information about distinct immune cell populations and are also available  
286 with routine HE staining. Another advantage of using the TMAs was that they were  
287 taken specifically from the tumor region. However, integrating the HE-stained WSIs

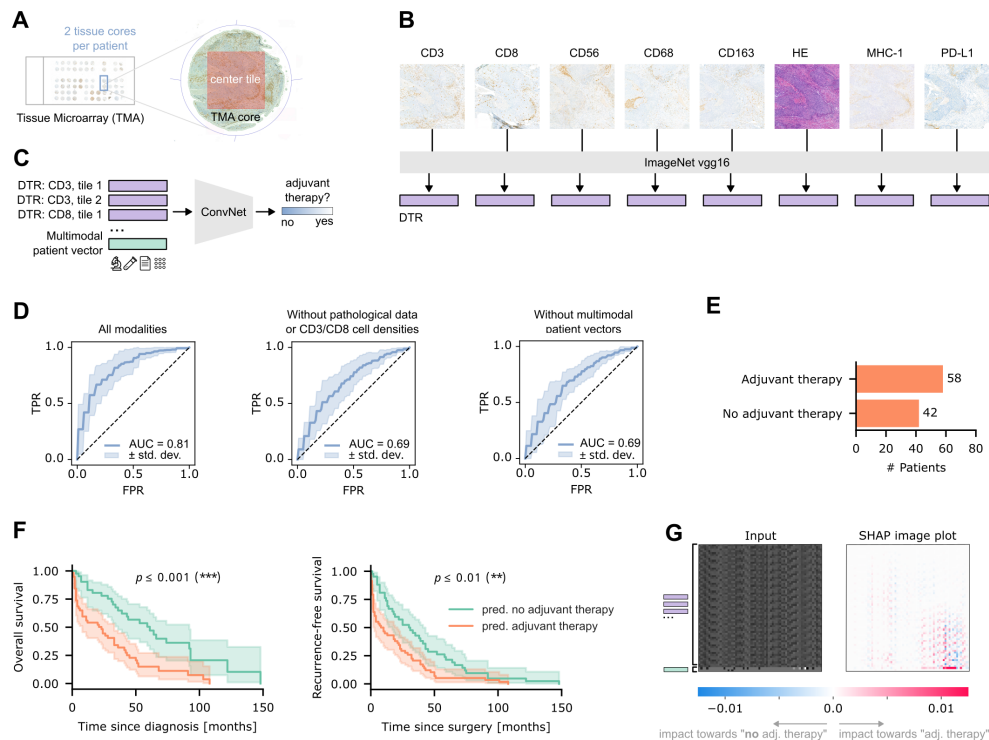

**Fig. 4** Combining multimodal feature vectors with image embeddings. (A) Tile extraction. From each TMA cores (two cores per patient), a tile was extracted from the center. (B) Vgg16, pre-trained on ImageNet, was used to extract deep texture representations [27] from tiles extracted from TMAs with 8 distinct markers, of which 7 are immunohistochemistry markers. (C) Stacking of features to train a Convolutional Neural Network for treatment choice prediction. (D) Receiver-operating characteristic (ROC) curves from 10-fold cross-validation. In the left plot, all modalities were used. In the center plot, pathological features and cell densities were excluded. In the right plot, the multimodal patient vectors were excluded. (E) Predictions for the test dataset. (F) Kaplan-Meier curves for the test dataset, with patients grouped by predictions (G) Visual explanation using SHAP values for a test sample.

288 additionally could further improve the prediction of clinical outcomes or treatment  
 289 choices since multiple studies have shown that neural networks trained on WSIs alone  
 290 can predict risk or prognosis, for example using Multiple-Instance-Learning [28-30].

291 We further relied consistently on an early fusion approach for training any multi-  
 292 modal AI in our study. This means first fusing the features of distinct modalities and  
 293 then training a single model, which is recommended as an initial strategy [19]. Future  
 294 studies should also evaluate if the classification performance could be improved using  
 295 joint fusion, where neural networks are not only used as feature extractors but are also  
 296 trained in the process [19]. An in-depth comparison of different methods for extracting  
 297 and fusing features, especially from our comprehensive histologic image data, could  
 298 be very beneficial.

299 We extracted ICD codes from the surgery reports and integrated them into mul-  
300 timodal embeddings using bag-of-words. However, we did not incorporate the plain  
301 texts themselves. Since the surgery reports describe the tumor resection in detail and  
302 could potentially provide additional information about the severity of the disease, they  
303 could be further explored. For example, text embeddings could be extracted using a  
304 pre-trained transformer and integrated into the multimodal vectors [20].

305 Our Machine Learning models are limited to binary classification, however, other  
306 options could be explored using the available event data. For example, a regression  
307 model could be implemented to predict the time to events such as recurrence or death.  
308 Moreover, models could be trained to predict risk scores using a loss function such as  
309 Cox partial likelihood loss as proposed by Chen et al. [21].

310 In this work, the densities of CD3- and CD8-positive cells were computed from  
311 the TMAs. We analyzed these regarding their relationship to clinical outcomes (see  
312 Supplementary Fig. S8) and integrated them in the multimodal vectors for ML model  
313 training (see Figure 2A). In the future, immune cells expressing the markers CD56,  
314 CD163, PD-L1, and MHC-1 as available in HANCOCK could be analyzed as well and  
315 integrated for ML model training accordingly.

316 A limitation of our multimodal ML model for treatment prediction is that it could  
317 not account for all possible reasons for deciding against adjuvant therapy. For example,  
318 no data about patient refusal or comorbidities was available. Hence, collecting more  
319 detailed information about the process of treatment selection could be beneficial.

320 It has been shown that tissue or cell detection and subsequent classification can  
321 enable the investigation of quantitative biomarkers [31, 32]. Therefore, annotations  
322 of the histologic images in our dataset could be beneficial for biomarker discovery.  
323 We already provide manual annotations of tumor regions in the WSIs of the primary  
324 tumor. However, these annotations were done sparsely instead of exhaustively and  
325 they were not done by pathologists. We aim to extend HANCOCK in the future,  
326 for example by creating high-quality annotations of distinct cell types. To this end,  
327 we could leverage Deep Learning models and existing manual annotations of nuclei.  
328 The annotation or segmentation of larger tissue regions could also be considered and  
329 incorporated into the dataset. Further, combining molecular data with histopatholog-  
330 ical data is a promising approach [33]. Hence, we aim to further integrate genomic or  
331 transcriptomic data, to increase the long-term impact of the dataset.

332 Finally, HANCOCK allows the possibility to explore the concept of digital twins,  
333 a digital representation of cancer patients, that could improve decisions in cancer  
334 care [34]. We implicitly used this concept in the training/test data split (Figure 2)  
335 to compute the cosine similarity between patients to ensure a specific distribution of  
336 patients in a given subset (see Methods).

## 337 **Methods**

### 338 **Data collection**

339 The data was acquired from the Department of Otorhinolaryngology and Head and  
340 Neck Surgery and from the Pathological Institute of the University Hospital in Erlan-  
341 gen. All data was collected and published following the local ethics committee vote

342 (#23-22-Br). Retrospective, multimodal data was gathered from patients who were  
343 diagnosed with head and neck cancer between 2005 and 2019. Only patients who  
344 had a curative first treatment were included. The modalities in our dataset can  
345 be categorized into image data (histopathological images), structured data (clinical,  
346 pathological, and blood data), and free text (surgery reports). Supplementary Fig.  
347 S11 shows the available and missing data types for all patients.

348 Tissue samples of the respective patients were collected from the pathological  
349 archive of the University Hospital in Erlangen. The samples originate from the pri-  
350 mary tumor and, if present, positive lymph nodes that had been resected. The tissue  
351 samples had been fixed in formalin, embedded in paraffin, and routinely stained with  
352 HE. The 709 primary tumor sections were scanned using a 3DHistech P1000 at  $82.44\times$   
353 magnification. A single slide was available for 701 cases whereas two slides were avail-  
354 able for eight cases. The 396 lymph node sections were scanned using an Aperio Leica  
355 Biosystems GT450 at  $40\times$  magnification and using 3DHistech P1000 at  $51.42\times$  mag-  
356 nification. All digitized WSIs were stored in the pyramidal Aperio file format (.svs).  
357 Additionally, TMAs were created from the paraffin-embedded primary tumor blocks.  
358 The TMA cores with a diameter of 1.5 mm were extracted from the tumor center and  
359 the tumor invasion front. They were stained using HE and they were stained for spe-  
360 cific immune cell populations using the IHC markers CD3, CD8, CD56, CD68, CD163,  
361 PD-L1, and MHC-1. CD3-positive cells represent T cells, CD8-positive cells repre-  
362 sent cytotoxic T cells, and CD56-positive cells represent natural killer cells. CD68 and  
363 CD163 were used to detect monocytes and macrophages. PD-L1 plays a major role in  
364 regulating the immune response. It is expressed by tumor cells to deactivate cytotoxic  
365 T cells and is a target for immunotherapy [35]. The major histocompatibility com-  
366 plex class I (MHC-1) displays antigens to cytotoxic T cells and is also important for  
367 determining the prognosis and treatments involving immunotherapy [36]. From each  
368 patient, at least two cores were collected per origin and marker. This resulted in 368  
369 TMAs, each with cores arranged in 12 rows by 6 columns. The TMAs were scanned  
370 using a 3DHistech P1000 at  $82.44\times$  magnification.

371 Structured pathological data originating from the analysis of the primary tumor  
372 and lymph node sections was harmonized and compiled in tabular format. It includes  
373 comprehensive information such as the cancer site, staging, grading, and histologic  
374 type. The clinical data includes each patient's age, sex, and smoking status. It fur-  
375 ther contains information and timestamps of events such as treatments, recurrence,  
376 progress, metastasis, or death. The data was collected from the hospital information  
377 system and by screening various documents such as general and radiotherapy records.  
378 Blood test results of the corresponding patients in a range of 14 days around local  
379 surgery were retrieved from the hospital's archive. Each measurement was accompa-  
380 nished by the parameter's name, group, unit, and LOINC code (Logical Observation  
381 Identifiers Names and Codes) [37].

382 Surgery reports were collected by filtering the hospital's database by patient iden-  
383 tifiers and time range. Reports of patients diagnosed in 2006 were not available, as  
384 reports were not entered into the database until 2007. The surgery reports follow a  
385 template that includes the medical history and report in the document's body and  
386 metadata in the header. All documents were compiled into a .pdf file.

## 387 Data preprocessing

388 The data was anonymized by assigning a unique, consecutive ID ("001" to "763")  
389 randomly to each patient. Our data is patient-centered. This means that each WSI,  
390 each core in a TMA, each surgery report, and each entry in the structured data is  
391 mapped to a single patient ID. The preprocessing steps for each data modality are  
392 described in the following.

393 TMAs and WSIs were converted from the manufacturer's file format (.mrxs) to the  
394 pyramidal Aperio file format (.svs). An Aperio SVS file contains a macro image and a  
395 label image. The label image in particular contains potentially identifying information.  
396 Therefore, we anonymized the files by removing the label images, i.e., by replacing  
397 the image with zeros. To allow the mapping of each TMA core to the corresponding  
398 patient, we created TMA maps in .csv format (comma-separated values) that can be  
399 imported into QuPath.

400 We identified the most important clinical and pathological features and ensured  
401 that these were complete for all patients. We performed data cleaning to remove incon-  
402 sistent or redundant data. For patients with more than one entry in the clinical table,  
403 we kept the entry with the earlier diagnosis date. Each following entry was discarded  
404 because it reported a recurrence of the disease rather than the initial diagnosis. We  
405 de-identified the clinical and pathological data by removing all names and dates. The  
406 year of the initial diagnosis was retained, but its date was removed. For anonymiza-  
407 tion purposes, all dates of events were replaced by the number of days since the initial  
408 diagnosis. This way, the timeline from the diagnosis to the end of treatment could  
409 still be reconstructed. We corrected spelling errors, summarized and harmonized table  
410 entries, and assigned self-explanatory labels. The tables were finally converted into  
411 Javascript-Object Notation (JSON). Descriptions of all fields in the JSON files with  
412 their data types and possible values were summarized in data dictionaries, shown in  
413 Supplementary Tables S1, S2, and S3.

414 The results of blood tests were available as structured, tabular data. We first  
415 filtered the data to select values that were measured at specified units, excluding  
416 intensive care units. For each patient, we chose a single pre-operative measurement  
417 of each parameter. To this end, we selected the latest available measurement before  
418 the surgery date because relevant blood tests are usually performed one to three days  
419 before. If no pre-operative value was available, the value from the surgery day itself  
420 was selected. The number of available measurements for these time points is shown  
421 in Supplementary Fig. S12. The complete blood count, coagulation parameters, elec-  
422 trolytes, and renal function parameters were routinely assessed. Additional parameters  
423 were calcium, magnesium, glomerular filtration rate, and glucose. Although it was only  
424 available for 94 patients, we included C-reactive protein (CRP) since elevated CRP  
425 levels are associated with poor prognosis in patients with head and neck cancer [38].  
426 The blood dataset was converted to JSON format.

427 The surgery reports were first converted from .pdf to .txt format. Each document  
428 had a header containing the operating clinicians, treatment date, the patient's name,  
429 and identifiers such as the admission number. The header additionally contained OPS  
430 codes and ICD codes. We used regular expressions in Python to search for keywords  
431 and obtain relevant data. This way, we extracted ICD codes, OPS codes, and the

432 medical history along with the surgery report itself. We selected reports from the first  
433 treatment date, i.e. from the local surgery, and discarded all others. Most patient  
434 names had already been masked when they had been entered into the system. How-  
435 ever, many texts contained names of operating clinicians. Therefore, we used regular  
436 expressions to substitute any names following medical or academic titles. Addition-  
437 ally, we performed a search using regular expressions and lists of all names of patients  
438 and clinicians. Finally, the reports and medical histories were screened manually for  
439 any remaining identifying information. Patient names, clinician names, locations, and  
440 dates were replaced by placeholders. The number of replaced terms is shown in Sup-  
441plementary Table 4. The documents were saved to plain text (.txt) files. Additionally,  
442 we translated all surgery reports, and medical histories from German to English using  
443 the DeepL API [39]. For translating short descriptions to English, we used ChatGPT  
444 (GPT-3.5) [40]. For convenience, HANCOCK contains the German original and the  
445 translated version of the texts. Supplementary Fig. S3 shows word clouds of the most  
446 common terms in the translated documents.

### 447 **Annotation of primary tumor sections**

448 For training AI models on WSIs using supervised learning, the annotation or seg-  
449 mentation of present tumor regions is usually required [22]. WSIs often contain large  
450 areas of tissue that might be irrelevant or even misleading for the corresponding  
451 task. We sparsely annotated representative tumor areas in the primary tumor sections  
452 using QuPath. To this end, we manually selected one or several regions of interest  
453 representing the tumor’s histology while avoiding areas that contain artifacts, white  
454 background, or healthy tissue such as muscular or glandular tissue. This approach is  
455 based on the protocol for the analysis of deep texture representations [41]. An exhaus-  
456 tive annotation of all present tumor regions or distinct tissue types was not possible  
457 due to time constraints. We provide the resulting polygon annotations in “.geojson”  
458 format to enable effortless extraction of tumor tiles for future works.

### 459 **Multimodal patient vectors**

460 We created multimodal patient vectors for two purposes. First, the vectors were used  
461 to determine a dataset split for training and testing. Second, they were used to train  
462 models to predict outcomes or treatment choices. To this end, we created embeddings  
463 that condensed data from each modality and concatenated them to a single vector  
464 per patient.

465 We encoded the clinical and pathological features using different techniques based  
466 on their type. Binary encoding was applied for features such as lymphatic, vascular,  
467 or perineural invasion, the patient’s sex, or the presence of carcinoma in situ. The pT  
468 stage and pN stage were considered ordinal features and transformed into consecutive  
469 labels. Categorical features such as primary site or histologic type were assigned labels  
470 and were later one-hot encoded. For integrating laboratory parameters, we used the  
471 raw values of the hematology group, i.e. the complete blood count.

472 The ICD codes, extracted from surgery reports, provide a more detailed classifi-  
473 cation of the disease than the available structured data does. The sequence of ICD

474 codes for each patient was considered a sentence and converted to vectors using a bag-  
475 of-words model, inspired by the bag-of-disease-codes approach by Placido et al. [42].  
476 To this end, the first four characters of each ICD code were used. Codes covered by  
477 less than three patients were discarded.

478 The structured pathological data did not contain any information about the  
479 immune response of each patient. To include this information, we performed a quan-  
480 titative analysis of TMAs using the open-source software QuPath (version 0.4.3) [43].  
481 The density of T lymphocytes has been shown to be a prognostic marker [44, 45].  
482 Inspired by the Immunoscore [24, 46], we computed the density of CD3- and CD8-  
483 positive cells in the tumor center and invasion front per tumor area. To this end, we  
484 used QuPath to de-array the TMAs and match the tissue cores with patient IDs. Next,  
485 tissue detection was performed using thresholding. Strong artifacts were manually  
486 removed from the detected regions. Using QuPath’s positive cell detection feature, we  
487 obtained the positive cell count per mm<sup>2</sup> tumor area. Supplementary Fig. S13A shows  
488 exemplary TMA cores with detected positive cells and Supplementary Fig. S13B the  
489 respective cell densities. The distribution of the densities is shown in Supplementary  
490 Fig. S13C.

491 The single-modality vectors for each patient were finally concatenated to a multi-  
492 modal vector with a length of 103. We used UMAP to visualize the multimodal patient  
493 vectors in 2D. Beforehand, one-hot encoding was performed for categorical features,  
494 missing values were imputed, and z-score normalization was applied to ordinal and  
495 numeric features, i.e. the values were centered around the mean with unit variance.  
496 The axes were normalized to the range between zero and one.

## 497 Dataset split using a genetic algorithm

498 We aimed to provide a training dataset and a test dataset that is suitable to test  
499 any AI algorithm for its generalizability. We aimed for our test dataset to fulfill the  
500 following criteria proposed by Wagner et al. [18]: First, the data should be split at  
501 a patient level. Second, both datasets should follow a similar distribution of target  
502 classes, in this case, the recurrence and survival status. We created two distinct dataset  
503 splits, each into 80% training and 20% test data. The first split should follow the  
504 distribution of the training dataset concerning relevant characteristics, by including  
505 information from different modalities. The second should be out of distribution and  
506 contain outlier cases. To create both splits, we used evolutionary optimization [47].

507 We implemented a genetic algorithm, where each individual represented a possible  
508 split by a vector of zeros (patients assigned to training) and ones (patients assigned  
509 to test). The objective of the genetic algorithm was to maximize the fitness of an  
510 individual, i.e. of a split with  $N$  test points. Before computing the fitness of each  
511 split, missing values were imputed and categorical features were subsequently one-hot  
512 encoded. A penalty was subtracted from the fitness to achieve a class-balanced split.  
513 This penalty was defined as the sum of differences between each class distribution  $d =$   
514  $\frac{N_{positive}}{N}$  overall and in the current test dataset. Considering recurrence and survival  
515 status as target classes, the number of classes was  $C = 2$  in our case. The penalty for  
516  $C$  classes was weighted by a weight  $\alpha$ . A similar approach was introduced by Florez-  
517 Revuelta who used a genetic algorithm to split multi-label data while maximizing the



518 similarity between class distributions [48]. We calculated the fitness of an individual  
519 as follows:

520 For the in-distribution split, the fitness of an individual was defined as the sum of  
521 cosine distances from each test point  $x_i$  to its nearest neighboring test point  $x_{i,nn}$ :

$$\text{fitness}_{in} = \sum_{i=1}^N \left( 1 - \frac{\vec{x}_i \cdot \vec{x}_{i,nn}}{\|\vec{x}_i\| \|\vec{x}_{i,nn}\|} \right) - \alpha \sum_{k=1}^C |d_k - d_{k,all}|$$

522 For the out-of-distribution split, we calculated the sum of cosine distances between  
523 all pairs of test points  $x$ :

$$\text{fitness}_{out} = \sum_{i=1}^{N-1} \sum_{j=i+1}^N \left( 1 - \frac{\vec{x}_i \cdot \vec{x}_j}{\|\vec{x}_i\| \|\vec{x}_j\|} \right) - \alpha \sum_{k=1}^C |d_k - d_{k,all}|$$

524 The population size was set to 10,000 and the genetic algorithm was terminated  
525 after 50 iterations with no further improvement. The population was iteratively  
526 updated using parent selection (tournament selection with elitism) and one-point  
527 crossover with inversion mutation until convergence. The genetic algorithm was only  
528 applied to patients with complete patient vectors. However, for some patients not all  
529 required modalities were available. These were subsequently assigned to the training  
530 dataset. The final splits were summarized as a list of patient IDs in JSON format.

## 531 Outcome prediction for distinct dataset splits

532 For training Machine Learning models to predict recurrence or survival, three different  
533 data splits were used. The first split defined "in distribution" cases as test data,  
534 the second split defined "out of distribution" data as test data, and the third split  
535 defined cases with oropharyngeal cancer as test data (see Figure 2D). For survival  
536 prediction (see Figure 2E), cases with non-tumor-specific death were excluded. All  
537 other cases, including those with unknown causes of death, were considered. The class  
538 labels correspond to the survival status, i.e. "living" and "deceased". Binary class  
539 labels were also defined for recurrence prediction (see Figure 2E). The classes were  
540 defined as (i) patients who had no recurrence and survived at least three years and  
541 (ii) patients who had a recurrence within three years.

542 As recommended by Huang et al., we applied an early fusion approach as an initial  
543 strategy, i.e. we created the multimodal patient vectors and trained a single model [19].  
544 We used three different train-test splits of the dataset, namely the in-distribution  
545 and out-of-distribution datasets created using the genetic algorithm. Another split  
546 was created by assigning all laryngeal carcinomas to the test dataset. We used the  
547 Synthetic Majority Oversampling Technique (SMOTE) to handle class imbalance [49].  
548 One classifier was trained and tested for each of the three splits (see Figure 2D).

## 549 Treatment prediction using Machine Learning

550 To explore the ability of an AI model to suggest whether adjuvant therapy is needed or  
551 not, we split the dataset in the following way. Patients who had no adjuvant therapy  
552 but were deceased or had a recurrence, metastasis, or progress were assigned to the

553 hold-out test dataset. All remaining cases were assigned to the training dataset, as  
554 shown in Figure 3A. We chose this setting to explore if an AI model could potentially  
555 identify patients who did not receive but would have needed adjuvant therapy. In  
556 identifying deceased patients, we considered the overall survival as the cause of death  
557 was not available for all cases. The class labels were defined as "no adjuvant therapy  
558 used" and "adjuvant therapy used".

559 We used the single-modality vectors (clinical, pathological, blood, ICD codes, TMA  
560 cell densities) individually and their combination (multimodal patient vectors) to  
561 train Random Forest classifiers. For both single-modal and multimodal data, we used  
562 10-fold cross-validation and reported the average ROC curve along with the AUC  
563 score. To handle the class imbalance problem, we applied SMOTE [49]. To avoid data  
564 leakage, we ensured that missing value imputation and normalization were performed  
565 in each iteration using statistics of the current training folds. To investigate the most  
566 important features, we computed SHAP values and visualized them for the ten most  
567 relevant features in a summary plot [23]. Finally, a classifier was trained on the full  
568 training dataset of multimodal patient vectors and the predictions for the test dataset  
569 were obtained. The training was performed for five iterations and the resulting ROC  
570 curves and AUC scores were averaged.

## 571 Treatment prediction using Deep Neural Networks

572 Aiming to integrate histologic features into a model for treatment prediction, we used  
573 the same dataset split as before (see 3A) and trained a Convolutional Neural Network.  
574 To this end, we extracted features from TMAs stained using all eight available markers.  
575 Each slide image contains tissue cores of several patients. To map these cores to patient  
576 IDs, we de-arrayed the TMAs using QuPath and imported the TMA maps. Next, we  
577 extracted a single tile from the center of each TMA core. As for most patients, two  
578 cores and eight markers were available, resulting in 16 tiles per patient. Every tile was  
579 fed to a feature extractor to obtain an embedding vector of length 256. To this end,  
580 we used the feature extractor implemented by Komura et al. [27] which computes a  
581 gram-matrix of feature maps obtained from convolutional layers in the network and  
582 converts it to a one-dimensional embedding. We used a VGG16 as a feature extractor  
583 pre-trained on ImageNet and obtained features from the layer "block3\_conv3" [25, 26].

584 Next, we stacked the extracted image features and multimodal patient vectors to  
585 obtain a 2D embedding for each patient. Min-max scaling was applied to the image  
586 features using the minimum and maximum value computed from all image features  
587 in the training dataset. We trained a custom CNN on the image-like embeddings  
588 and performed a grid search to tune its hyperparameters. The approach of encod-  
589 ing and stacking multimodal features into a single source suitable for training CNNs  
590 was inspired by Nawaz et al. who fused image and text embeddings to improve  
591 classification performance [50].

592 We applied 10-fold cross-validation and reported ROC curves. A final model was  
593 trained on the full dataset and test predictions were obtained. To visually explain  
594 predictions, SHAP image plots were created for test samples [51]. As background  
595 samples for the SHAP algorithm, 100 random training samples were used.

## 596 Data analysis

597 Overall survival curves were estimated using the Kaplan-Meier method [52]. The anal-  
598 ysis considered the time between the initial diagnosis and death or the end of follow-up.  
599 Patients who were alive at the end of the follow-up were censored. We computed  
600 overall survival curves for all patients and for patients grouped by different character-  
601 istics, see Supplementary Fig. S6. For estimating the recurrence-free survival (see Fig.  
602 3E), any occurrence of metastasis, progress, recurrence, or death was considered as an  
603 event and the duration was defined as the time between the first treatment (surgery)  
604 and the event.

605 The clinical data includes various events, such as treatments, progress of the dis-  
606 ease, diagnosis of metastases, recurrence, and death or end of follow-up. We visualized  
607 the timelines of these events, see Supplementary Fig. S5.

## 608 Statistics and Evaluation

609 The performance of classifiers was reported using ROC curves and corresponding  
610 AUC scores. To compute ROC curves and AUC scores, ML models were either trained  
611 and evaluated five times (see Figure 2E) or trained using 10-fold cross-validation (see  
612 Figures 3B and 4D). The ROC curves and AUC scores were then averaged over the  
613 iterations or the ten folds, respectively.

614 To evaluate the results of classifiers trained to predict adjuvant treatment, Kaplan-  
615 Meier curves were estimated and compared. To this end, we split the test cases into  
616 two groups based on the predicted classes. The first group contained cases where no  
617 adjuvant treatment was predicted (probability for adjuvant therapy recommendation  
618 below or equal to 0.5) and the second group contained cases where adjuvant treatment  
619 was predicted (probability above 0.5). Kaplan-Meier curves were estimated separately  
620 for the two groups. We used a log-rank test to compare survival curves and reported  
621 whether the p-value was below the significance level of 0.05 (\*), 0.001 (\*\*), or 0.0001  
622 (\*\*\*).

623 We applied the Wilcoxon-Mann-Whitney test to compare the distribution of CD3-  
624 positive and CD8-positive cell density of patients grouped by recurrence and survival  
625 status, as shown in Supplementary Fig. S8.

## 626 Data availability

627 The HANCOCK dataset is publicly available at <https://hancock.research.fau.eu/>.  
628 An overview of the dataset, including the number and format of files, is shown in  
629 Supplementary Fig. S14.

## 630 Code availability

631 Code for data exploration, processing histologic images, feature extraction, generating  
632 data splits, outcome prediction, and adjuvant treatment prediction is available at  
633 [https://github.com/ankilab/HANCOCK\\_MultimodalDataset](https://github.com/ankilab/HANCOCK_MultimodalDataset).

634 **Supplementary information.** The supplement contains the Supplementary  
635 Figures S1-S14 and the Supplementary Tables S1-S4.

636 **Acknowledgments.** This work was funded in part by the Federal Ministry of  
637 Education and Research (BMBF) to AOG and ME (01KD2211B) and to AMK  
638 (01KD2211A). We thank Mohammadhamed Mirbagheri for his excellent technical  
639 assistance.

## References

- [1] Sung, H., Ferlay, J., Siegel, R.L., Laversanne, M., Soerjomataram, I., Jemal, A., Bray, F.: Global cancer statistics 2020: Globocan estimates of incidence and mortality worldwide for 36 cancers in 185 countries. *CA: a cancer journal for clinicians* **71**(3), 209–249 (2021)
- [2] Johnson, D.E., Burtneess, B., Leemans, C.R., Lui, V.W.Y., Bauman, J.E., Grandis, J.R.: Head and neck squamous cell carcinoma. *Nature reviews Disease primers* **6**(1), 92 (2020)
- [3] Budach, V., Tinhofer, I.: Novel prognostic clinical factors and biomarkers for outcome prediction in head and neck cancer: a systematic review. *The Lancet Oncology* **20**(6), 313–326 (2019)
- [4] Gatta, G., Botta, L., Sánchez, M.J., Anderson, L.A., Pierannunzio, D., Licitra, L., Hackl, M., Zielonke, N., Oberaigner, W., Van Eycken, E., *et al.*: Prognoses and improvement for head and neck cancers diagnosed in europe in early 2000s: The eurocare-5 population-based study. *European journal of cancer* **51**(15), 2130–2143 (2015)
- [5] Chow, L.Q.: Head and neck cancer. *New England Journal of Medicine* **382**(1), 60–72 (2020)
- [6] Cramer, J.D., Burtneess, B., Le, Q.T., Ferris, R.L.: The changing therapeutic landscape of head and neck cancer. *Nature reviews Clinical oncology* **16**(11), 669–683 (2019)
- [7] Leemans, C.R., Snijders, P.J., Brakenhoff, R.H.: The molecular landscape of head and neck cancer. *Nature Reviews Cancer* **18**(5), 269–282 (2018)
- [8] Wang, Z., Jensen, M.A., Zenklusen, J.C.: A practical guide to the cancer genome atlas (tcga). *Statistical Genomics: Methods and Protocols*, 111–141 (2016)
- [9] Ang, K.K., Harris, J., Wheeler, R., Weber, R., Rosenthal, D.I., Nguyen-Tân, P.F., Westra, W.H., Chung, C.H., Jordan, R.C., Lu, C., *et al.*: Human papillomavirus and survival of patients with oropharyngeal cancer. *New England Journal of Medicine* **363**(1), 24–35 (2010)
- [10] Lechner, M., Liu, J., Masterson, L., Fenton, T.R.: Hpv-associated oropharyngeal cancer: Epidemiology, molecular biology and clinical management. *Nature reviews Clinical oncology* **19**(5), 306–327 (2022)

- [11] Burtness, B., Harrington, K.J., Greil, R., Soulières, D., Tahara, M., Castro, G., Psyrris, A., Basté, N., Neupane, P., Bratland, Å., *et al.*: Pembrolizumab alone or with chemotherapy versus cetuximab with chemotherapy for recurrent or metastatic squamous cell carcinoma of the head and neck (keynote-048): a randomised, open-label, phase 3 study. *The Lancet* **394**(10212), 1915–1928 (2019)
- [12] Network, C.G.A., *et al.*: Comprehensive genomic characterization of head and neck squamous cell carcinomas. *Nature* **517**(7536), 576 (2015)
- [13] The Clinical Proteomic Tumor Analysis Consortium Head and Neck Squamous Cell Carcinoma Collection (CPTAC-HNSCC) (Version 16) [Data set]. *The Cancer Imaging Archive* (2018). <https://doi.org/10.7937/K9/TCIA.2018.UW45NH81>
- [14] Grossberg, A.J., Mohamed, A.S., Elhalawani, H., Bennett, W.C., Smith, K.E., Nolan, T.S., Williams, B., Chamchod, S., Heukelom, J., Kantor, M.E., *et al.*: Imaging and clinical data archive for head and neck squamous cell carcinoma patients treated with radiotherapy. *Scientific data* **5**(1), 1–10 (2018)
- [15] Elhalawani, H., Mohamed, A.S., White, A.L., Zafereo, J., Wong, A.J., Berends, J.E., AboHashem, S., Williams, B., Aymard, J.M., Kanwar, A., *et al.*: Matched computed tomography segmentation and demographic data for oropharyngeal cancer radiomics challenges. *Scientific data* **4**, 170077 (2017)
- [16] NCI Cancer Institute Genomic Data Commons Data Portal. <https://portal.gdc.cancer.gov> Accessed 2024-04-30
- [17] ICD-10-GM Version 2024, Systematisches Verzeichnis, Internationale Statistische Klassifikation der Krankheiten und Verwandter Gesundheitsprobleme, 10. Revision, German Modification, Stand 15. September 2023, Köln (2024). Bundesinstitut für Arzneimittel und Medizinprodukte (BfArM) im Auftrag des Bundesministeriums für Gesundheit (BMG) unter Beteiligung der Arbeitsgruppe ICD des Kuratoriums für Fragen der Klassifikation im Gesundheitswesen (KKG). [https://www.bfarm.de/DE/Kodiersysteme/Services/Downloads/\\_node.html#anker-icd-10-gm-downloads](https://www.bfarm.de/DE/Kodiersysteme/Services/Downloads/_node.html#anker-icd-10-gm-downloads) (visited 2024-04-18)
- [18] Wagner, S.J., Matek, C., Shetab Boushehri, S., Boxberg, M., Lamm, L., Sadafi, A., Waibel, D.J., Marr, C., Peng, T.: Make deep learning algorithms in computational pathology more reproducible and reusable. *Nature Medicine* **28**(9), 1744–1746 (2022)
- [19] Huang, S.-C., Pareek, A., Seyyedi, S., Banerjee, I., Lungren, M.P.: Fusion of medical imaging and electronic health records using deep learning: a systematic review and implementation guidelines. *NPJ digital medicine* **3**(1), 136 (2020)
- [20] Soenksen, L.R., Ma, Y., Zeng, C., Boussioux, L., Villalobos Carballo, K., Na, L., Wiberg, H.M., Li, M.L., Fuentes, I., Bertsimas, D.: Integrated multimodal

- artificial intelligence framework for healthcare applications. *NPJ digital medicine* **5**(1), 149 (2022)
- [21] Chen, R.J., Lu, M.Y., Wang, J., Williamson, D.F., Rodig, S.J., Lindeman, N.I., Mahmood, F.: Pathomic fusion: an integrated framework for fusing histopathology and genomic features for cancer diagnosis and prognosis. *IEEE Transactions on Medical Imaging* **41**(4), 757–770 (2020)
- [22] Laak, J., Litjens, G., Ciompi, F.: Deep learning in histopathology: the path to the clinic. *Nature medicine* **27**(5), 775–784 (2021)
- [23] Lundberg, S.M., Erion, G., Chen, H., DeGrave, A., Prutkin, J.M., Nair, B., Katz, R., Himmelfarb, J., Bansal, N., Lee, S.-I.: From local explanations to global understanding with explainable ai for trees. *Nature Machine Intelligence* **2**(1), 2522–5839 (2020)
- [24] Foersch, S., Glasner, C., Woerl, A.-C., Eckstein, M., Wagner, D.-C., Schulz, S., Kellers, F., Fernandez, A., Tserea, K., Kloth, M., *et al.*: Multistain deep learning for prediction of prognosis and therapy response in colorectal cancer. *Nature medicine* **29**(2), 430–439 (2023)
- [25] Simonyan, K., Zisserman, A.: Very deep convolutional networks for large-scale image recognition. arXiv preprint arXiv:1409.1556 (2014)
- [26] Deng, J., Dong, W., Socher, R., Li, L.-J., Li, K., Fei-Fei, L.: Imagenet: A large-scale hierarchical image database. In: 2009 IEEE Conference on Computer Vision and Pattern Recognition, pp. 248–255 (2009). Ieee
- [27] Komura, D., Kawabe, A., Fukuta, K., Sano, K., Umezaki, T., Koda, H., Suzuki, R., Tominaga, K., Ochi, M., Konishi, H., *et al.*: Universal encoding of pan-cancer histology by deep texture representations. *Cell Reports* **38**(9) (2022)
- [28] Yao, J., Zhu, X., Huang, J.: Deep multi-instance learning for survival prediction from whole slide images. In: Medical Image Computing and Computer Assisted Intervention–MICCAI 2019: 22nd International Conference, Shenzhen, China, October 13–17, 2019, Proceedings, Part I 22, pp. 496–504 (2019). Springer
- [29] Yao, J., Zhu, X., Jonnagaddala, J., Hawkins, N., Huang, J.: Whole slide images based cancer survival prediction using attention guided deep multiple instance learning networks. *Medical Image Analysis* **65**, 101789 (2020)
- [30] Lu, M.Y., Williamson, D.F., Chen, T.Y., Chen, R.J., Barbieri, M., Mahmood, F.: Data-efficient and weakly supervised computational pathology on whole-slide images. *Nature Biomedical Engineering* **5**(6), 555–570 (2021)
- [31] Geessink, O.G., Baidoshvili, A., Klaase, J.M., Ehteshami Bejnordi, B., Litjens, G.J., Pelt, G.W., Mesker, W.E., Nagtegaal, I.D., Ciompi, F., Laak, J.A.:

- Computer aided quantification of intratumoral stroma yields an independent prognosticator in rectal cancer. *Cellular oncology* **42**, 331–341 (2019)
- [32] AbdulJabbar, K., Raza, S.E.A., Rosenthal, R., Jamal-Hanjani, M., Veeriah, S., Akarca, A., Lund, T., Moore, D.A., Salgado, R., Al Bakir, M., *et al.*: Geospatial immune variability illuminates differential evolution of lung adenocarcinoma. *Nature medicine* **26**(7), 1054–1062 (2020)
- [33] Schneider, L., Laiouar-Pedari, S., Kuntz, S., Krieghoff-Henning, E., Hekler, A., Kather, J.N., Gaiser, T., Froehling, S., Brinker, T.J.: Integration of deep learning-based image analysis and genomic data in cancer pathology: A systematic review. *European journal of cancer* **160**, 80–91 (2022)
- [34] Kaul, R., Ossai, C., Forkan, A.R.M., Jayaraman, P.P., Zelcer, J., Vaughan, S., Wickramasinghe, N.: The role of ai for developing digital twins in healthcare: The case of cancer care. *Wiley Interdisciplinary Reviews: Data Mining and Knowledge Discovery* **13**(1), 1480 (2023)
- [35] Zandberg, D.P., Strome, S.E.: The role of the pd-1: Pd-1 pathway in squamous cell carcinoma of the head and neck. *Oral oncology* **50**(7), 627–632 (2014)
- [36] Cornel, A.M., Mimpfen, I.L., Nierkens, S.: Mhc class i downregulation in cancer: underlying mechanisms and potential targets for cancer immunotherapy. *Cancers* **12**(7), 1760 (2020)
- [37] Forrey, A.W., Mcdonald, C.J., DeMoor, G., Huff, S.M., Leavelle, D., Leland, D., Fiers, T., Charles, L., Griffin, B., Stalling, F., *et al.*: Logical observation identifier names and codes (loinc) database: a public use set of codes and names for electronic reporting of clinical laboratory test results. *Clinical chemistry* **42**(1), 81–90 (1996)
- [38] Chen, Y., Cong, R., Ji, C., Ruan, W.: The prognostic role of c-reactive protein in patients with head and neck squamous cell carcinoma: A meta-analysis. *Cancer medicine* **9**(24), 9541–9553 (2020)
- [39] DeepL: Translate with DeepL API. <https://www.deepl.com/de/pro-api?cta=menu-pro-api> Accessed 2024-02-16
- [40] OpenAI: ChatGPT (February 2024 version) [Large language model]. <https://chat.openai.com/>
- [41] Herdiantoputri, R.R., Komura, D., Fujisaka, K., Ikeda, T., Ishikawa, S.: Deep texture representation analysis for histopathological images. *STAR protocols* **4**(2), 102161 (2023)
- [42] Placido, D., Yuan, B., Hjaltelin, J.X., Zheng, C., Haue, A.D., Chmura, P.J., Yuan, C., Kim, J., Umeton, R., Antell, G., *et al.*: A deep learning algorithm to

- predict risk of pancreatic cancer from disease trajectories. *Nature medicine* **29**(5), 1113–1122 (2023)
- [43] Bankhead, P., Loughrey, M.B., Fernández, J.A., Dombrowski, Y., McArt, D.G., Dunne, P.D., McQuaid, S., Gray, R.T., Murray, L.J., Coleman, H.G., *et al.*: Qupath: Open source software for digital pathology image analysis. *Scientific reports* **7**(1), 1–7 (2017)
- [44] Hecht, M., Gostian, A.O., Eckstein, M., Rutzner, S., Grün, J., Illmer, T., Hautmann, M.G., Klautke, G., Laban, S., Brunner, T., *et al.*: Safety and efficacy of single cycle induction treatment with cisplatin/docetaxel/durvalumab/tremelimumab in locally advanced hnscc: first results of checkrad-cd8. *Journal for immunotherapy of cancer* **8**(2) (2020)
- [45] Tumeh, P.C., Harview, C.L., Yearley, J.H., Shintaku, I.P., Taylor, E.J., Robert, L., Chmielowski, B., Spasic, M., Henry, G., Ciobanu, V., *et al.*: Pd-1 blockade induces responses by inhibiting adaptive immune resistance. *Nature* **515**(7528), 568–571 (2014)
- [46] Pagès, F., Mlecnik, B., Marliot, F., Bindea, G., Ou, F.-S., Bifulco, C., Lugli, A., Zlobec, I., Rau, T.T., Berger, M.D., *et al.*: International validation of the consensus immunoscore for the classification of colon cancer: a prognostic and accuracy study. *The Lancet* **391**(10135), 2128–2139 (2018)
- [47] Simon, D.: *Evolutionary Optimization Algorithms*. John Wiley & Sons, ??? (2013)
- [48] Florez-Revuelta, F.: Evosplit: An evolutionary approach to split a multi-label data set into disjoint subsets. *Applied Sciences* **11**(6), 2823 (2021)
- [49] Chawla, N.V., Bowyer, K.W., Hall, L.O., Kegelmeyer, W.P.: Smote: synthetic minority over-sampling technique. *Journal of artificial intelligence research* **16**, 321–357 (2002)
- [50] Nawaz, S., Calefati, A., Janjua, M.K., Anwaar, M.U., Gallo, I.: Learning fused representations for large-scale multimodal classification. *IEEE Sensors Letters* **3**(1), 1–4 (2018)
- [51] Lundberg, S.M., Lee, S.-I.: A unified approach to interpreting model predictions. *Advances in neural information processing systems* **30** (2017)
- [52] Kaplan, E.L., Meier, P.: Nonparametric estimation from incomplete observations. *Journal of the American statistical association* **53**(282), 457–481 (1958)
